# Supplementary material
Source: Springer Nature journal article supplement (https://www.springermedizin.de/resource/supplementary/12885_2012_4384_MOESM2_ESM.pdf/9466136)

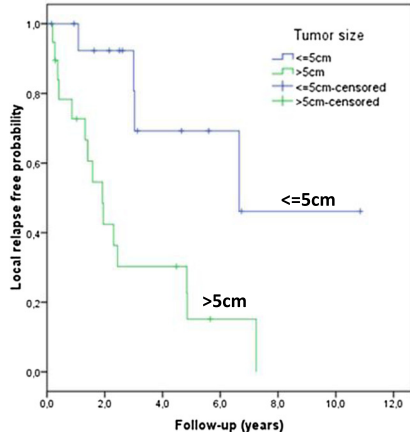

**A: Tumor size**

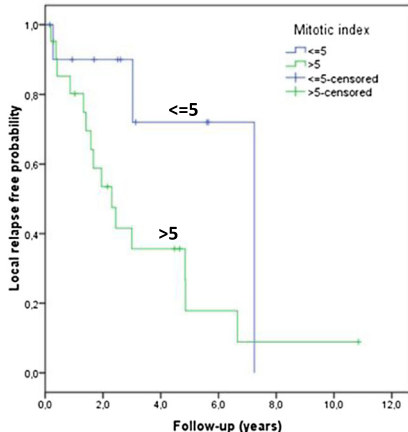

**B: Mitotic index**

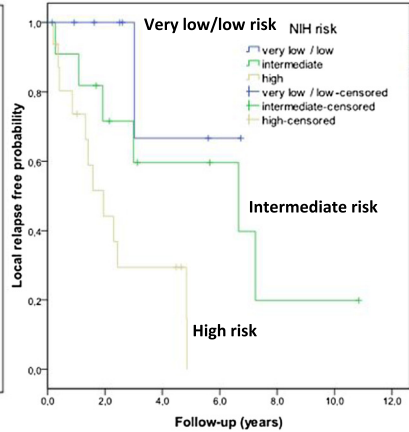

**C: NIH risk**

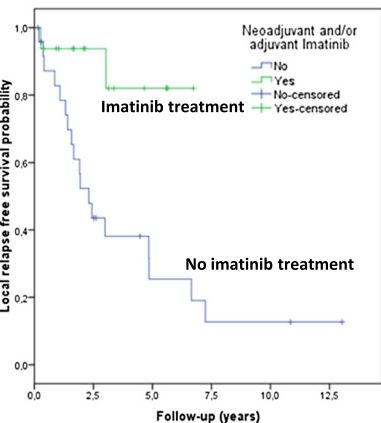

**D: Neoadjuvant and/or adjuvant imatinib**

Supplement: MOESM2 [file 9466136]
